# Supplementary material for: Metal–support interactions in Fe–Cu–K admixed with SAPO-34 catalysts for highly selective transformation of CO2 and H2 into lower olefins
Source: Royal Society of Chemistry journal article supplement (doi:10.1039/d1ta03327a), 2021-01-01
Supplement: d1ta03327a1.pdf [file d1ta03327a1.pdf]

## SUPPORTING INFORMATION

### **Metal-Support Interactions in Fe-Cu-K Admixed with SAPO-34 Catalysts for Highly Selective Transformation of CO<sub>2</sub> and H<sub>2</sub> into Lower Olefins**

Jie Ding<sup>1,2</sup>, Qiang Liu<sup>1</sup>, Run-ping Ye<sup>4</sup>, Weibo Gong<sup>2</sup>, Fan Zhang<sup>5</sup>, Xiang He<sup>6</sup>, Yulong Zhang<sup>8</sup>, Qin Zhong<sup>1\*</sup>, Morris D. Argyle<sup>3\*</sup>, Maohong Fan<sup>2,7\*</sup>

*<sup>1</sup>School of Chemical Engineering, Nanjing University of Science and Technology, Nanjing, Jiangsu 210094, P. R. China, tonlyjding@126.com (Q. Zhong)*

*<sup>2</sup>Departments of Chemical and Petroleum Engineering, University of Wyoming, Laramie, Wyoming 82071, USA, mfan@uwyo.edu (M. Fan)*

*<sup>3</sup>Department of Chemical Engineering, Brigham Young University, Provo, UT 84602, USA, mdargyle@byu.edu (M. D. Argyle)*

*<sup>4</sup>Laboratory of Catalysis, Dalian Institute of Chemical Physics, Chinese Academy of Sciences, Dalian, Liaoning 116023, China*

*<sup>5</sup>National Institute of Clean-and-Low-Carbon Energy, P.O. Box 001 Shenhua, NICE, Beijing, China*

*<sup>6</sup>Nanjing Institute of Geography and Limnology, Chinese Academy of Sciences, Nanjing 210008, China*

*<sup>7</sup>School of Civil and Environmental Engineering, Georgia Institute of Technology, Atlanta, GA, 30332, USA*

*<sup>8</sup>School of Chemistry and Chemical Engineering, Henan Polytechnic University, Jiaozuo, Henan 45400, China*

## S1 Preparation of catalysts

**Preparation of Iron-copper catalysts.** Iron-copper catalysts were prepared by a hydrothermal method with  $\text{Fe}(\text{NO}_3)_3 \cdot 9\text{H}_2\text{O}$  (Aladdin, purity  $\geq 99.9\%$ ) and  $\text{Cu}(\text{NO}_3)_2 \cdot 3\text{H}_2\text{O}$  (Aladdin, AR) as the Fe and Co sources, respectively, and with urea (Aladdin, purity  $\geq 99.5\%$ ) as the precipitant agent. Typically, 4.04 g (0.01 mol)  $\text{Fe}(\text{NO}_3)_3 \cdot 9\text{H}_2\text{O}$ , 2.42 g (0.01 mol)  $\text{Cu}(\text{NO}_3)_2 \cdot 3\text{H}_2\text{O}$  and 3.00 g (0.05 mol) urea were dissolved in 80 mL deionized water. The solutions were transferred into a 100 mL Teflon lined cylinder to react for 12 h at 120 °C. The precipitates were calcined at 500 °C for 4 h to obtain Iron-copper catalysts.

**Preparation of Iron-copper-potassium catalysts.** Iron-copper-potassium catalysts were prepared by impregnation. Typically, 2 g of iron-copper catalysts were added into 100 mL of deionized water and the desired amount of  $\text{KNO}_3$  (Aladdin, purity  $\geq 99.0\%$ ) was added to the solution. The molar ratio of  $\text{K}/(\text{Fe}+\text{Co})$  used for preparing iron-copper-potassium catalysts was 0, 0.05, 0.10 and 0.15. The mixed solutions were heated at 80 °C until the liquid was evaporated. The obtained material was dried at 120 °C for 12 h. Finally, Iron-copper-potassium catalysts was obtained after calcination at 500 °C for 4 h, which was expressed as  $\text{Fe}_x\text{Cu}_y\text{K}_z$ . The x, y and z represent the molar ratio of iron, copper and potassium, respectively. The  $\text{Fe}_{0.45}\text{Cu}_{0.45}\text{K}_{0.10}$  was defined to FCK, and the R-FCK was obtained after being reduced in a flow 37.5 mL/min mixture gas containing 80 vol%  $\text{H}_2$  and 20 vol%  $\text{N}_2$  at 400 °C for 4 h.

**Preparation of SAPO-34.** SAPO-34 was synthesized by a hydrothermal method using pseudoboehmite (72 wt%  $\text{Al}_2\text{O}_3$ ), orthophosphoric acid (85 wt%  $\text{H}_3\text{PO}_4$ ), silica sol (30 wt%  $\text{SiO}_2$ ), and trimethylamine (TEA) as the sources of Al, P, Si, and the template, respectively. The molar ratio of  $\text{TEA}/\text{Al}_2\text{O}_3/\text{SiO}_2/\text{P}_2\text{O}_5/\text{H}_2\text{O}$  in the synthesis gel was 3:1:0.25:1:50. After the hydrothermal synthesis at 200 °C for 72 h, the solid sample was recovered by centrifugation, washing, and drying at 100 °C for 6 h. The sample was calcined in air at 550 °C to remove the organic template.

**Preparation of admixed catalysts composed of  $\text{Fe}_x\text{Cu}_y\text{K}_z$  and SAPO-34.** The admixed catalysts were prepared by physical mixing. Typically, 0.1 g  $\text{Fe}_x\text{Cu}_y\text{K}_z$  and 0.1 g SAPO-34 were mixed, which is defined as  $\text{Fe}_x\text{Cu}_y\text{K}_z/\text{SAPO}$ . 1 g  $\text{Fe}_x\text{Cu}_y\text{K}_z/\text{SAPO}$  was

obtained after five preparations. The  $\text{Fe}_{0.45}\text{Cu}_{0.45}\text{K}_{0.10}/\text{SAPO-34}$  is defined as FCK/SAPO. R-FCK/SAPO was obtained by reducing FCK/SAPO at 400 °C under 80 vol%  $\text{H}_2/20$  vol%  $\text{N}_2$  for 4 h.

**Preparation of Cu-Fe alloy and Fe-Cu alloy.** For the preparation of Cu-Fe alloy, 5.61 g of  $\text{Fe}(\text{NO}_3)_3 \cdot 9\text{H}_2\text{O}$  and 0.84 g of  $\text{Cu}(\text{NO}_3)_2 \cdot 3\text{H}_2\text{O}$  were dissolved in 100 mL distilled  $\text{H}_2\text{O}$  under stirring. The above solution was heated to 80 °C under stirring until it was dried. The obtained precipitation was calcined at 500 °C, and then it was reduced at 400 °C under the  $\text{H}_2$  atmosphere to obtain Cu-Fe alloy. For the preparation of Fe-Cu alloy, 0.64 g of  $\text{Fe}(\text{NO}_3)_3 \cdot 9\text{H}_2\text{O}$  and 3.44 g of  $\text{Cu}(\text{NO}_3)_2 \cdot 3\text{H}_2\text{O}$  were dissolved in 100 mL distilled  $\text{H}_2\text{O}$  under stirring. The above solution was heated to 80 °C under stirring until it was dried. The obtained precipitation was calcined at 500 °C, and then it was reduced at 400 °C under the  $\text{H}_2$  atmosphere to obtain Fe-Cu alloy.

## S2 Characterization of Catalysts

The scanning electron microscopy (SEM) and energy dispersive spectroscopy (EDS) characterizations were performed with Hitachi S-4800II instrument. High-resolution Transmission Electron Microscopy (HRTEM) characterization was conducted on a Tecnai G2 S-Twin F30 TEM operated at 200 kV. X-ray diffraction (XRD) patterns and in-situ XRD patterns were recorded on a Bruker D2 Phaser with  $\text{Cu K}\alpha$  radiation (36 kV voltage and 30 mA) as the X-ray source. X-ray photoelectron spectroscopy (XPS) was tested on a Kratos Axis Ultra DLD equipment with a monochromated Al K-alpha source with an error of 0.1 eV.  $^{57}\text{Fe}$  Mössbauer spectra were acquired in an MR-351 constant-acceleration Mössbauer spectrometer (FSAT, Germany) drive with a triangular reference signal at room temperature. In-situ infrared (IR) spectra were conducted using Nicolet 6700 spectrometer with a resolution of 4  $\text{cm}^{-1}$ , and all the prepared catalysts were reduced at 400 °C in a flowing 37.5 mL/min  $\text{H}_2\text{-N}_2$  mixture (80 vol.%  $\text{H}_2$ ) for 4 h, followed by evacuating the prepared catalysts for 30 min to remove the physisorbed  $\text{H}_2$  and  $\text{N}_2$  prior to characterization. Pyridine-IR spectra were also obtained on a Nicolet 6700 spectrometer with a resolution of 4  $\text{cm}^{-1}$ . The concentration of different phases were calculated from GSAS program.

**H<sub>2</sub> temperature-programmed desorption/reduction (H<sub>2</sub>-TPD/H<sub>2</sub>-TPR).** H<sub>2</sub> temperature-programmed desorption/reduction (H<sub>2</sub>-TPD/H<sub>2</sub>-TPR) were performed with a Micromeritics Autochem II 2920 instrument. For H<sub>2</sub>-TPD, 0.12 g prepared catalysts were first reduced at 400 °C in a flowing 37.5 mL/min H<sub>2</sub>-N<sub>2</sub> mixture (80 vol% H<sub>2</sub>) for 4 h, and then the adsorption tests were conducted at 40 °C in a flowing 37.5 mL/min 100 vol% H<sub>2</sub> for 4 h. The desorption tests were conducted in a flowing 37.5 mL/min Ar with the temperature increase from room temperature to 900 °C at 10 °C/min. For H<sub>2</sub>-TPR, 0.12 g prepared catalysts were used in a flowing 37.5 mL/min H<sub>2</sub>-Ar mixture (10 vol.% H<sub>2</sub>) with the temperature increase from room temperature to 900 °C at 10 °C/min.

**CO<sub>2</sub> or H<sub>2</sub> pulse experiments.** CO<sub>2</sub> or H<sub>2</sub> pulse experiments were used to measure CO<sub>2</sub> and H<sub>2</sub> adsorption rates, which was conducted in a temporal analysis of products (TAP) reactor with setting the valve to generate  $\sim 6.0 \times 10^{11}$  molecules per pulse. The prepared catalysts were first pretreated at 400 °C in a flowing 37.5 mL/min H<sub>2</sub>-N<sub>2</sub> mixture (80 vol.% H<sub>2</sub>) for 1 h, and then the prepared catalysts were tested at 340 °C or 370 °C in a flowing 1 mL/min CO<sub>2</sub>-Ar or H<sub>2</sub>-Ar mixtures containing 0.001% CO<sub>2</sub> or H<sub>2</sub>. The differentially pumped gate valve was used to propagate CO<sub>2</sub>/Ar or H<sub>2</sub>/Ar mixtures into the analysis chamber, and the quadrupole mass spectrometer was used to quantify CO<sub>2</sub> or H<sub>2</sub> concentration

**CO<sub>2</sub> temperature-programmed desorption (CO<sub>2</sub>-TPD).** CO<sub>2</sub> temperature-programmed desorption (CO<sub>2</sub>-TPD) was performed with a Micromeritics Autochem II 2920. 0.12 g prepared catalysts were first reduced at 400 °C in a flowing 37.5 mL/min H<sub>2</sub>-N<sub>2</sub> mixture (80 vol% H<sub>2</sub>) for 4 h, and then the adsorption tests were conducted at 40 °C in a flowing 37.5 mL/min 100 vol% CO<sub>2</sub> for 4 h. The desorption tests were conducted in a flowing 37.5 mL/min He with the temperature increase from room temperature to 900 °C at 10 °C/min.

### S3 DFT calculation

Density functional theory calculations were carried out using VASP with the gradient-corrected PBE exchange-correction function<sup>[1-3]</sup>. In the calculation, a slab

model containing 4 formula units of metal oxides was employed, and a vacuum of 10 Å was set to simulate the surface in periodic boundary conditions; a 4×4×1 Monkhorst-Pack grid was used in the *k*-point sampling for the surface calculation. The energy cut off for the plane-waves was set to 450 eV<sup>[1,2]</sup>. Cu-Fe alloy models substituted top-layer Fe atoms with different numbers of Cu atoms<sup>[2,4-6]</sup>. The adsorption energy was calculated by:

$$E_{\text{ad}} = E_{\text{sm}} - E_{\text{surf}} - E_{\text{mol}}$$

where  $E_{\text{sm}}$  is the calculated total energy of reactants adsorbed on the surface,  $E_{\text{surf}}$  is the calculated energy of catalyst surface and  $E_{\text{mol}}$  is the calculated energy of reactants.

#### S4 Catalytic tests

The fixed-bed reactor was used to test the activities of prepared catalysts as previously reported<sup>[7]</sup>. Briefly, 1 g prepared catalysts were loaded into the reactor, and they were reduced at 400 °C in a flowing 37.5 mL/min H<sub>2</sub>-N<sub>2</sub> mixture (80 vol.% H<sub>2</sub>) for 4 h. After reduction, the prepared catalysts were tested at the reaction pressure of 1.5 MPa and the reaction temperature range from 300 to 400 °C in a flowing 25 mL/min CO<sub>2</sub>-H<sub>2</sub> mixtures (the volume ratio of CO<sub>2</sub> to H<sub>2</sub> is 1/4).

The products were analyzed by an online gas chromatograph with three channels, which installed two packed columns and two capillary columns. The first channel, used H<sub>2</sub> as the carrier gas, was equipped with a cascaded of a Porapak Q column (1 m), a 5 Å molecular sieve column (5 m) and a thermal conductivity detector (TCD), which was used to analyze the CO and CO<sub>2</sub>. The second channel, used highly pure N<sub>2</sub> as the carrier gas, was equipped with a cascaded of a Al<sub>2</sub>O<sub>3</sub> capillary column (30 m × 0.53 mm × 20 μm) and a FID detector to analyze CH<sub>4</sub>, C<sub>2</sub>H<sub>4</sub>, C<sub>2</sub>H<sub>6</sub>, C<sub>3</sub>H<sub>6</sub>, C<sub>3</sub>H<sub>8</sub>, C<sub>4</sub>H<sub>8</sub>, C<sub>4</sub>H<sub>10</sub>, C<sub>5</sub>H<sub>10</sub> and other hydrocarbons. The third channel, used highly pure N<sub>2</sub> as the carrier gas, was equipped with a cascaded of a PEG20000 capillary column (30 m × 0.53 mm × 20 μm) and a FID detector to analyze methanol. The conversion (*X*, %), space time yields (STY, mmol·g<sup>-1</sup><sub>cat</sub>·h<sup>-1</sup>), selectivities (*S*, %), and yields (%) were defined as follows:

$$X_{CO_2} = \left(1 - \frac{C_{CO_2,in} \cdot f_{in} - C_{CO_2,out} \cdot f_{out}}{C_{CO_2,in} \cdot f_{in}}\right)$$

$$S_{C_n} = \frac{C_{C_n,out}}{C_{CO} + C_{C_1,out} + C_{C_2,out} + \dots + C_{C_n,out} + \dots}$$

$$STY_{c_2 - c_4} = \frac{X_{CO_2}/100 \cdot S_{c_2 - c_4} / 100 \cdot GHSV_{CO_2}}{22.4}$$

where  $C_{CO_2,in}$  and  $C_{CO_2,out}$  are the inlet and outlet concentrations of  $CO_2$ , respectively, which are determined by GC analysis.  $f_{in}$  and  $f_{out}$  are the inlet and outlet flow of the fixed-bed reactor, respectively.  $C_{CO}$ ,  $C_{C_1,out}$ ,  $C_{C_2,out}$ , ...,  $C_{C_n,out}$  are the outlet concentrations of  $CO$ ,  $C_1$ ,  $C_2$ , ...,  $C_n$  compounds determined by GC analysis, respectively. The carbon balance, CBE, evaluated by the following equation, which was  $\geq 95\%$  in every test:

$$CBE = \frac{C_{CO} + C_{C_1,out} + 2 \times C_{C_2,out} + \dots + n \times C_{C_n,out} + \dots}{C_{CO_2,in} \cdot f_{in} - C_{CO_2,out} \cdot f_{out}}$$

## S5. Optimizations of catalytic performances

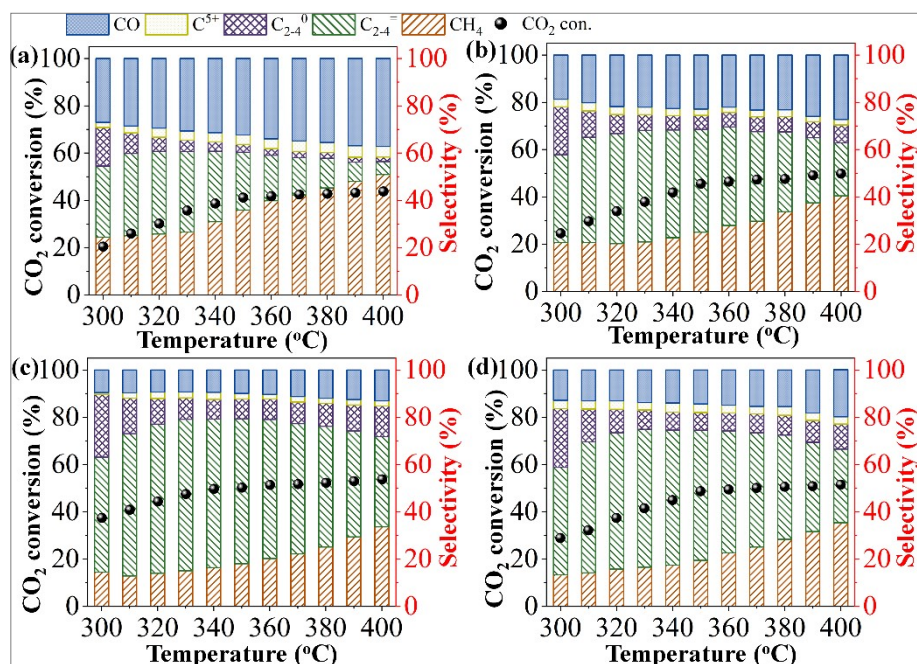

Fig. S1. Effect of K loading on catalytic activity [(a)  $\text{Fe}_{0.5}\text{Cu}_{0.5}/\text{SAPO-34}$ ; (b)  $\text{Fe}_{0.475}\text{Cu}_{0.475}\text{K}_{0.050}/\text{SAPO-34}$ ; (c)  $\text{Fe}_{0.45}\text{Cu}_{0.45}\text{K}_{0.10}/\text{SAPO-34}$ ; (d)  $\text{Fe}_{0.425}\text{Cu}_{0.425}\text{K}_{0.150}/\text{SAPO-34}$ . Mass ratio of  $\text{Fe}_x\text{Cu}_y\text{K}_z/\text{SAPO-34}$ : 1/1; Molar ratios of Fe/Cu: 1/1; GHSV:  $1500 \text{ mL}\cdot\text{h}^{-1}\cdot\text{g}^{-1}$ ; P: 1.5 MPa]

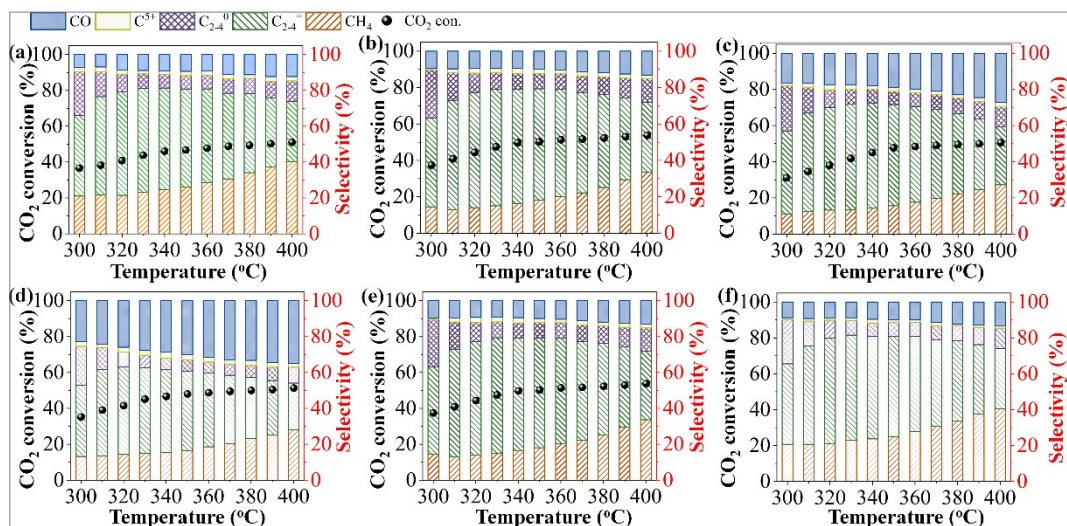

Fig. S2. Effect of Fe/Cu molar ratios and  $\text{Fe}_x\text{Cu}_y\text{K}_z$  to SAPO-34 mass ratios on catalytic activity [(a)  $\text{Fe}_{0.675}\text{Cu}_{0.225}\text{K}_{0.100}/\text{SAPO-34}$ ; (b)  $\text{Fe}_{0.45}\text{Cu}_{0.45}\text{K}_{0.10}/\text{SAPO-34}$ ; (c)  $\text{Fe}_{0.225}\text{Cu}_{0.675}\text{K}_{0.100}/\text{SAPO-34}$ . Mass ratio of  $\text{Fe}_x\text{Cu}_y\text{K}_z/\text{SAPO-34}$ : 2/1; K loading: 10 wt%; GHSV:  $1500 \text{ mL}\cdot\text{h}^{-1}\cdot\text{g}^{-1}$ ; P: 1.5 MPa. (d)  $\text{Fe}_{0.45}\text{Cu}_{0.45}\text{K}_{0.10}/\text{SAPO-34}$  with mass ratio of 2/1; (e)  $\text{Fe}_{0.45}\text{Cu}_{0.45}\text{K}_{0.10}/\text{SAPO-34}$  with mass ratio of 1/1; (f)

$\text{Fe}_{0.45}\text{Cu}_{0.45}\text{K}_{0.10}/\text{SAPO-34}$  with mass ratio of 1/2. Molar ratio of Fe/Cu: 1/1; K loading: 10 wt%; GHSV:  $1500 \text{ mL}\cdot\text{h}^{-1}\cdot\text{g}^{-1}$ ; P: 1.5 MPa]

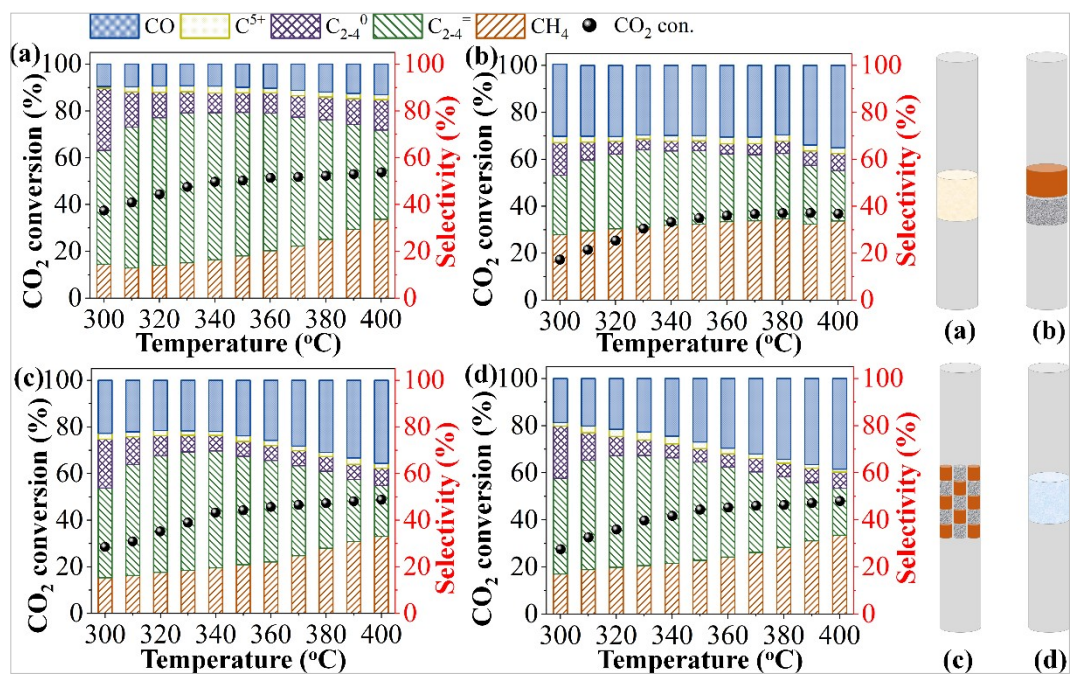

Fig. S3. Effect of loading method on catalytic activity [Right: catalytic activities; Left: loading method; (a)  $\text{Fe}_x\text{Cu}_y\text{K}_z$  mixed with SAPO-34; (b) SAPO-34 followed with  $\text{Fe}_x\text{Cu}_y\text{K}_z$ ; (c) Large  $\text{Fe}_x\text{Cu}_y\text{K}_z$  particle mixed with large SAPO-34 particle; (d)  $\text{Fe}_x\text{Cu}_y\text{K}_z$  mixed with  $\text{SiO}_2$  and SAPO-34. Mass ratio of  $\text{Fe}_x\text{Cu}_y\text{K}_z/\text{SAPO-34}$ : 1/1; Molar ratio of Fe/Cu: 1/1; K loading: 10 wt%; GHSV:  $1500 \text{ mL}\cdot\text{h}^{-1}\cdot\text{g}^{-1}$ ; P: 1.5 MPa]



## S6. Effects of GHSV and particle sizes on catalytic activity, and mass spectra

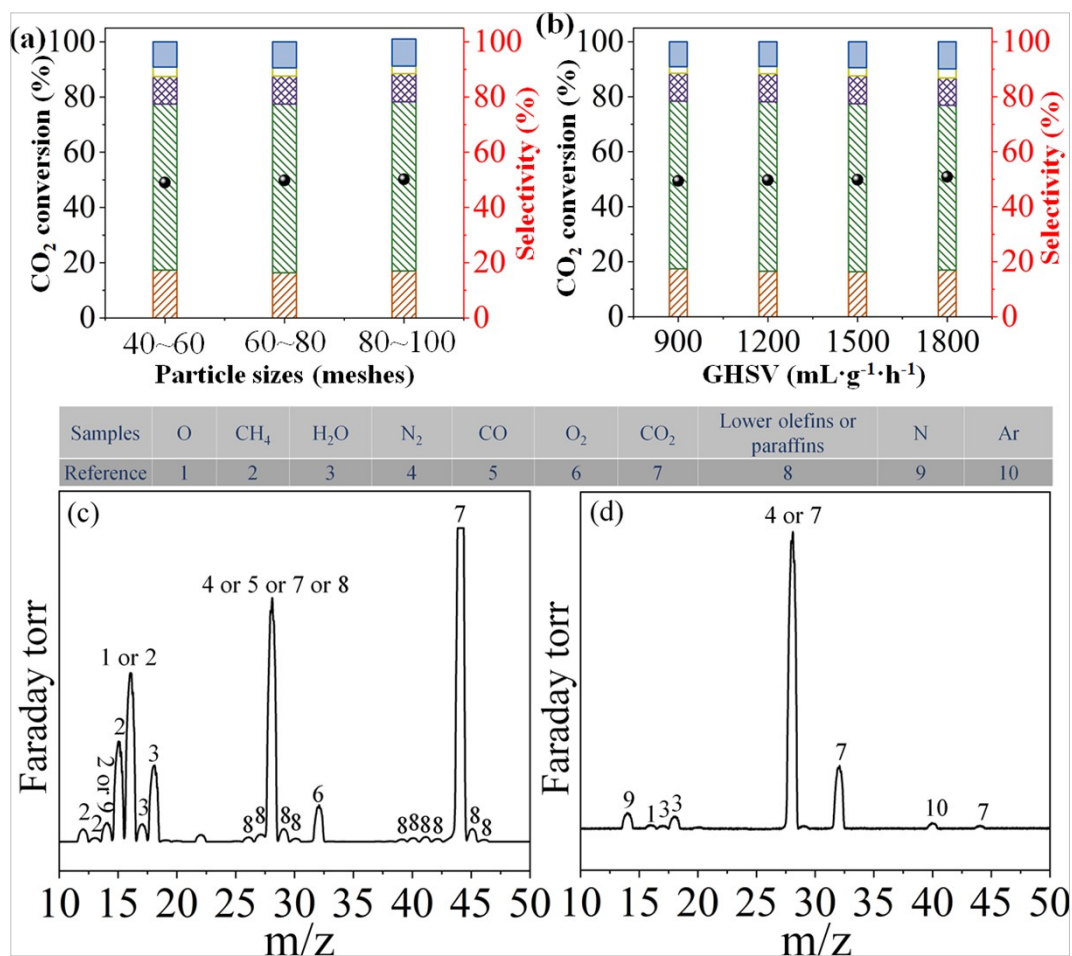

Fig. S4. Effect of particle sizes and GHSV on catalytic activity, and mass spectra of products from catalytic CO<sub>2</sub> hydrogenation and air [Mass ratio of Fe<sub>x</sub>Cu<sub>y</sub>K<sub>z</sub>/SAPO-34: 1/1; Molar ratio of Fe/Cu: 1/1; K loading: 10 wt%; GHSV: 1500 mL·h<sup>-1</sup>·g<sup>-1</sup>; P: 1.5 MPa. Mass spectra of (c) products from CO<sub>2</sub> hydrogenation and (d) Air]

## S7. Lower olefins yield and effect of NO on catalytic performances

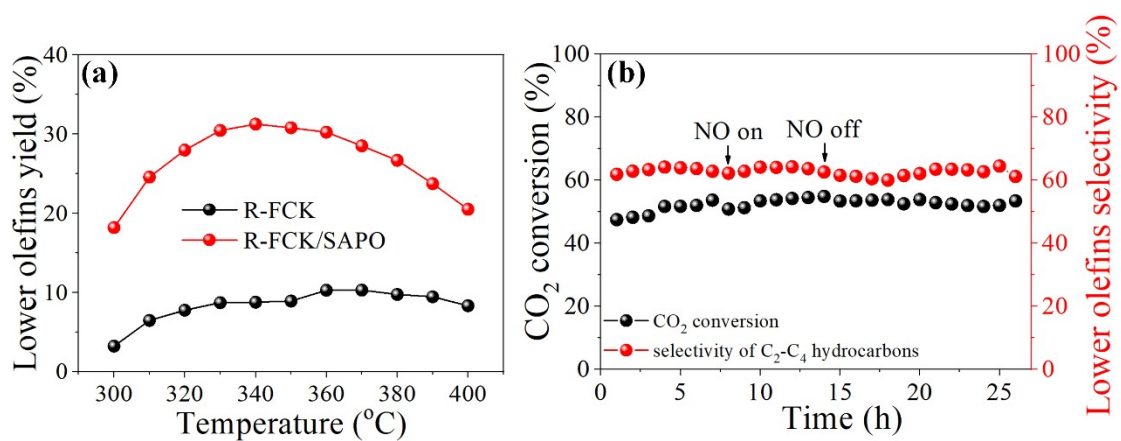

Fig. S5. Performances and characterizations of prepared catalysts. [(a) Lower olefins yield; (b) effect of NO on CO<sub>2</sub> conversion and selectivity]

## S8. Summary of performance for CO<sub>2</sub> hydrogenation to lower olefins

Table S1. Summary of performance for CO<sub>2</sub> hydrogenation to lower olefins

| Catalyst                                                                         | T<br>(°C) | P<br>(MPa) | X <sub>CO2</sub><br>(%) | S <sub>C2-4</sub> <sup>̄</sup><br>(%) | S <sub>CO</sub><br>(%) | STY<br>(mmol•g <sup>-1</sup> •h <sup>-1</sup> ) |
|----------------------------------------------------------------------------------|-----------|------------|-------------------------|---------------------------------------|------------------------|-------------------------------------------------|
| R-FCK/SAPO                                                                       | 330       | 1.50       | 47.52                   | 62.90                                 | 9.66                   | 4.19                                            |
| ZnZrO <sub>x</sub> /SAPO <sup>[8]</sup>                                          | 380       | 2.00       | 12.60                   | 65.04                                 | ~43                    | 3.29                                            |
| InZrO <sub>x</sub> /SAPO <sup>[9]</sup>                                          | 400       | 3.00       | 35.50                   | 48.85                                 | ≥80                    | 4.12                                            |
| ZnGa <sub>2</sub> O <sub>4</sub> /SAPO <sup>[10]</sup>                           | 400       | 3.00       | 13.00                   | 56.21                                 | ~67                    | 3.29                                            |
| CeO <sub>2</sub> -Pt@SiO <sub>2</sub> -Co <sup>[11]</sup>                        | 250       | 6.21       | 3.00                    | 40.00                                 | ~20                    | 1.03                                            |
| CuFeO <sub>2</sub> <sup>[12]</sup>                                               | 300       | 1.00       | 18.10                   | 39.70                                 | ~30                    | 1.32                                            |
| Co-Fe catalysts <sup>[13]</sup>                                                  | 220       | 0.92       | 27.20                   | 13.20                                 | ~50                    | 2.94×10 <sup>-6</sup>                           |
| FeSiKCu <sup>[14]</sup>                                                          | 500       | 1.30       | 15.00                   | 65.00                                 | NG                     | 2.18                                            |
| Cu-Zn-Al/HB <sup>[15]</sup>                                                      | 300       | 0.98       | 27.64                   | 43.20                                 | 53.40                  | 4.00                                            |
| Fe <sub>3</sub> O <sub>4</sub> /γ-Fe <sub>2</sub> O <sub>3</sub> <sup>[16]</sup> | 300       | 1.00       | 38.00                   | 35.00                                 | ~12                    | 4.01                                            |
| Fe-Zn-K <sup>[17]</sup>                                                          | 320       | 0.50       | 37.76                   | 48.89                                 | 11.13                  | 4.12                                            |
| Fe <sub>2</sub> O <sub>3</sub> /MOF <sup>[18]</sup>                              | 300       | 3.00       | 25.00                   | 45.00                                 | ~20                    | 4.14                                            |
| Fe-Co/K <sup>[19]</sup>                                                          | 300       | 1.10       | 31.00                   | 30.00                                 | ~20                    | 0.66                                            |
| Fe-Zn-Cu <sup>[20]</sup>                                                         | 275       | 1.00       | 39.80                   | 39.80                                 | ~10                    | 0.81                                            |

Note: “NG” means “not given”

## S9. EDS of R-FCK and R-FCK/SAPO

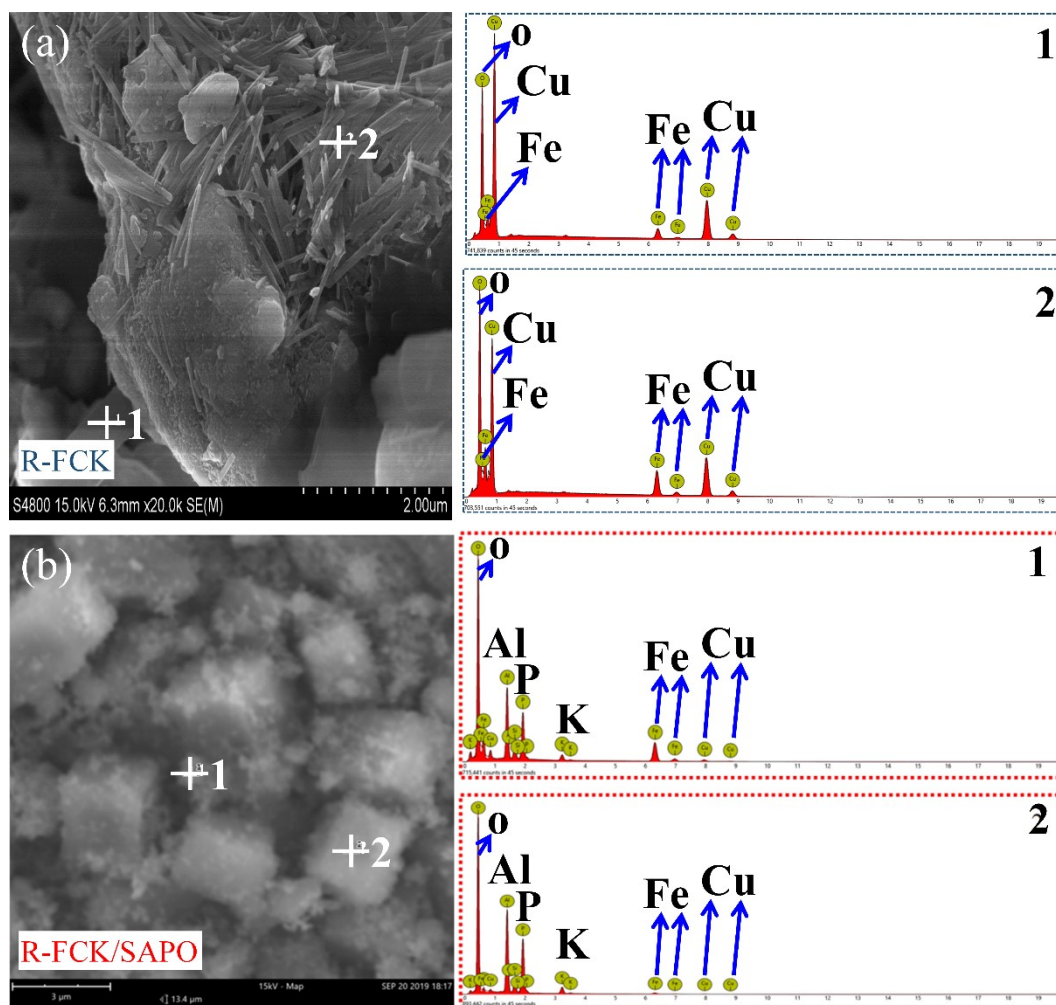

Fig. S6. EDS of R-FCK (1: Cu 90.68 mol.%; 2: Cu 21.05 mol.%) and R-FCK/SAPO (1: Cu 14.80 mol.%)

The elemental analysis of the second dot in Fig. S6b is not accurate because it contains amounts of Si, Al and P elements.

**S10. XRD patterns of R-FCK, R-FCK/SAPO, pure Cu and pure Fe**

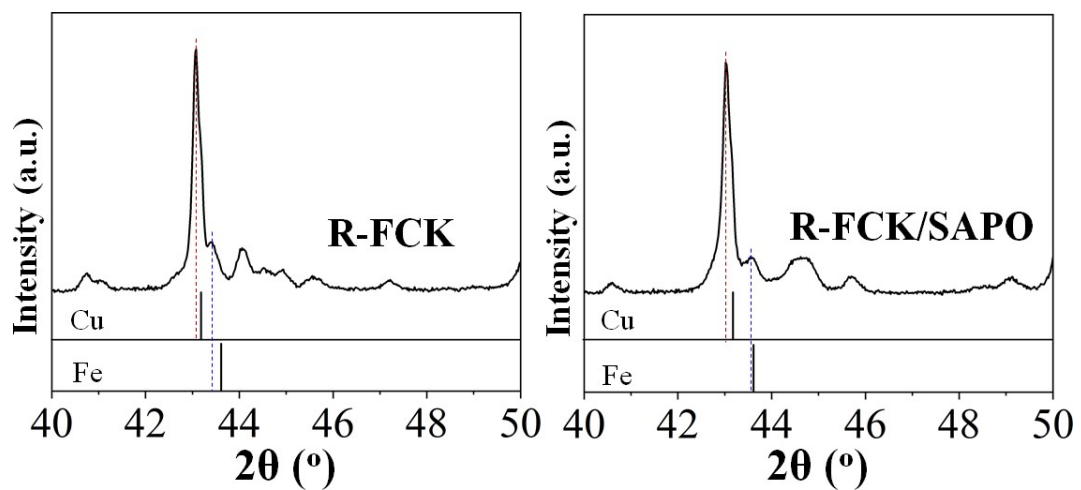

Fig. S7. XRD patterns of R-FCK, R-FCK/SAPO, pure Cu and pure Fe

### S11. Catalytic performances of Cu-Fe alloy and Fe-Cu alloy

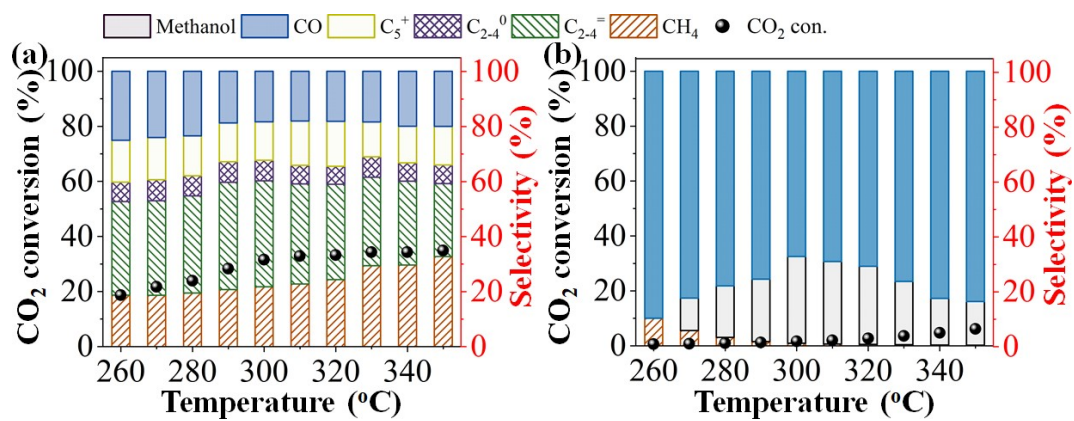

Fig. S8. Catalytic performances of (a) Cu-Fe alloy with 9.32 mol.% Cu and (b) Fe-Cu alloy with 21.05 mol.% Fe.

### S12. HRTEM image of fractured nanorods

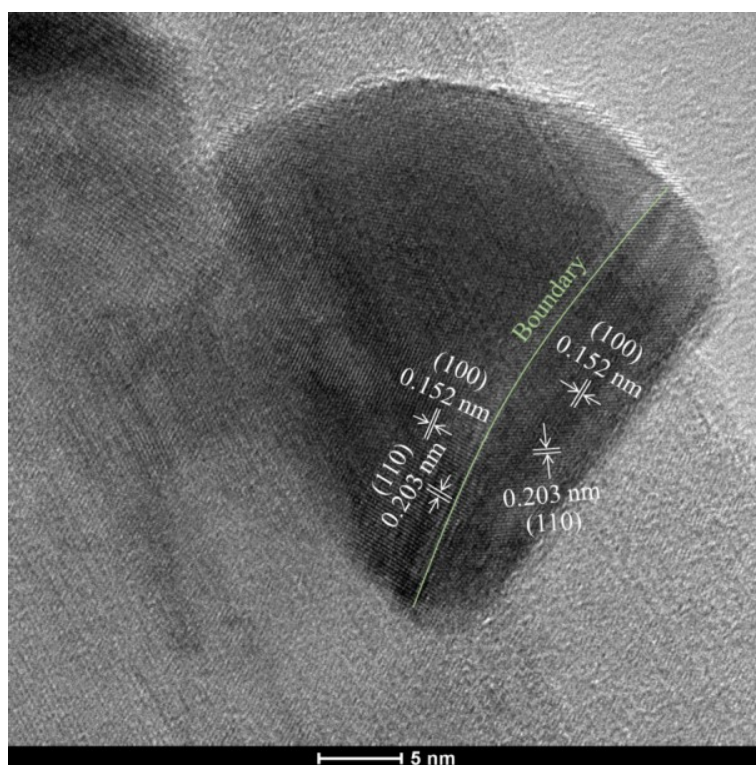

Fig. S9. HRTEM image of fractured nanorods

### S13. EDS images of R-FCK/SAPO and Cu<sub>2</sub>p XPS

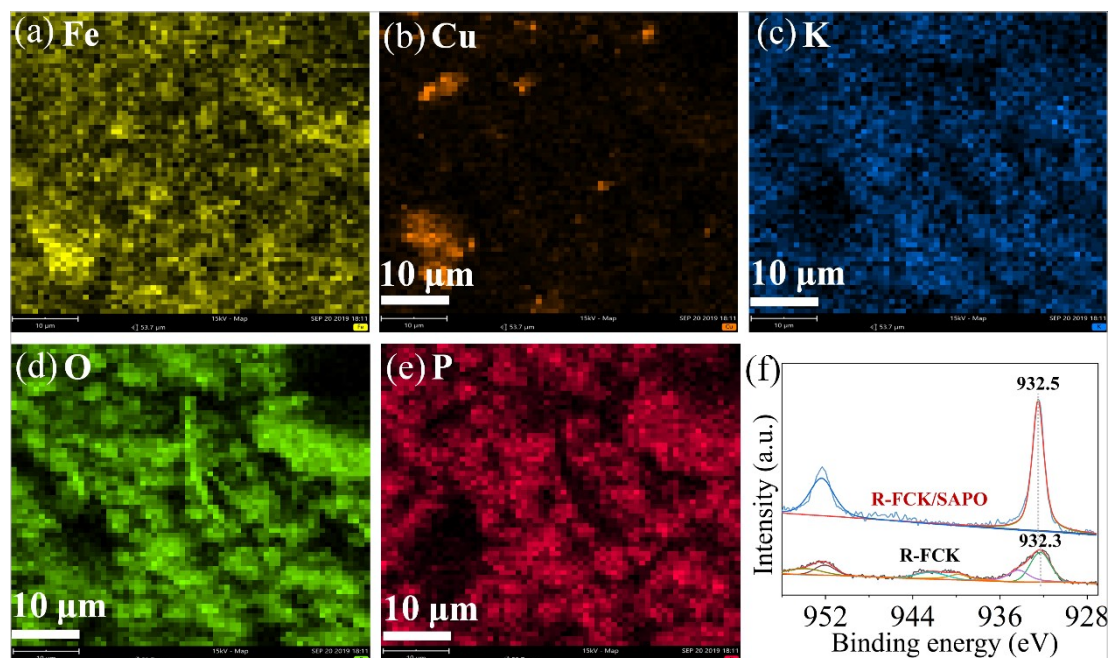

Fig. S10. EDS image of R-FCK/SAPO and Cu<sub>2</sub>p XPS

## S14 Elemental analysis of R-FCK and R-FCK/SAPO from XPS and AES

Table S2 Surface compositions of R-FCK and R-FCK/SAPO

| Samples    | Fe/%  | Fe <sup>0</sup> /% | Fe <sup>2+</sup> /% | Fe <sup>3+</sup> /% | Cu/% | Cu <sup>0</sup> /% | Cu <sup>+</sup> /% | Cu <sup>2+</sup> /% |
|------------|-------|--------------------|---------------------|---------------------|------|--------------------|--------------------|---------------------|
| R-FCK      | 5.60  | 1.62               | 2.00                | 1.98                | 3.08 | 0.29               | 1.13               | 1.66                |
| R-FCK/SAPO | 3.36  | 1.20               | 1.25                | 0.91                | 2.04 | 0.76               | 1.28               | 0                   |
| Samples    | K/%   |                    |                     | O/%                 |      |                    |                    |                     |
| R-FCK      | 27.03 |                    |                     | 64.29               |      |                    |                    |                     |
| R-FCK/SAPO | 1.74  |                    |                     | 39.02               |      |                    |                    |                     |

## S15. Calculation process of different Fe crystal planes on R-FCK and R-FCK/SAPO

According to the literature, the weight percentage of one phase can be calculated according to the following equation:

$$w_i = \frac{S_i M_i V_i}{\sum_j S_j M_j V_j} \quad (\text{S-1})$$

$S_i$  is referred to scale factor;  $M_i$  is referred to the cell mass;  $V_i$  is referred to the cell volume.

$S_i$  is positive to the peak intensity, which can be calculated as follows:

$$I_{hkl} = S \cdot M_{hkl} \cdot L_{hkl} \cdot |F_{hkl}| \quad (\text{S-2})$$

$I_{hkl}$  is referred to the absolute intensity of peak, which means the difference between the intensity and the background;  $M_{hkl}$  is referred to the multiplicity factor;  $L_{hkl}$  is referred to Lorentz factor;  $|F_{hkl}|$  is referred to structural amplitude.

For the Fe in R-FCK/SAPO, the Fe (110) and Fe (100) are two planes of cubic Fe phase. Both are in the same cell with different planes. Therefore, the  $W_i$  is directly relative to  $I_{hkl}$ , and the  $W_i$  is also equal to molar ratio ( $n_i$ ).



$$\frac{n_{(110)}}{n_{(100)}} = \frac{I_{(110)}}{I_{(100)}} = \frac{1782 - 580}{729 - 580} = 5.25$$

From the XRD patterns, the Fe in R-FCK/SAPO is mainly consisted of Fe (110) and Fe (100). Therefore, the molar percentage of Fe (110) phase is 84.0% and the one of Fe (100) is 16.0%.

For the Fe in R-FCK, the molar ratio of different Fe crystal planes is calculated as follows:

$$\frac{n_{(110)}}{n_{(100)}} = \frac{I_{(110)}}{I_{(100)}} = \frac{1689 - 692}{944 - 839} = 1.34$$

Therefore, the molar percentage of Fe (110) phase is 57.3% and the one of Fe (100) is 42.7%.

### S16. Detailed description of H<sub>2</sub>-TPR profiles

H<sub>2</sub>-TPR profiles of SAPO, R-FCK and R-FCK/SAPO are shown in Fig. S11. SAPO displays almost no hydrogen consumption, indicating that the SAPO is stable under the H<sub>2</sub> atmosphere at the reduction and reaction temperature. FCK presents a large peak ranging from 350 to 620 °C, with a small but wide shoulder at 620-750 °C. The former one is assigned to the reduction of Fe<sub>2</sub>O<sub>3</sub>/CuO to Fe<sub>3</sub>O<sub>4</sub>/Cu<sub>2</sub>O and the complete reduction of well-dispersed Fe<sub>2</sub>O<sub>3</sub>/CuO particles to Fe/Cu. The latter one is attributed to the reduction of Fe<sub>3</sub>O<sub>4</sub>/Cu<sub>2</sub>O to FeO or Fe/Cu. FCK can only be partially reduced at the reduction temperature (400 °C) and reaction temperature (300-400 °C), resulting in Fe<sub>3</sub>O<sub>4</sub>/Cu<sub>2</sub>O and well-dispersed Fe/Cu particles on the catalyst surface. FCK-SAPO displays a main peak at 270-450 °C, with a wide shoulder at 450-800 °C. These two peaks for R-FCK/SAPO have similar attributions to the peaks for FCK. However, the FCK-SAPO peaks shift to the lower temperature in comparison to those for FCK, which is due to the good dispersion of Fe and Cu species on the SAPO surface.

### S17. Surface compositions of R-FCK and R-FCK/SAPO from XPS and AES

Table S3 Surface compositions of R-FCK and R-FCK/SAPO from XPS and AES

| Samples    | Fe <sup>0</sup> /% | Fe <sup>2+</sup> /% | Fe <sup>3+</sup> /% | Cu <sup>0</sup> /% | Cu <sup>+</sup> /% | Cu <sup>2+</sup> /% |
|------------|--------------------|---------------------|---------------------|--------------------|--------------------|---------------------|
| R-FCK      | 29.07              | 35.63               | 35.29               | 9.44               | 36.60              | 53.96               |
| R-FCK/SAPO | 35.62              | 37.23               | 27.15               | 37.35              | 65.65              | 0                   |

### S18. Physical properties of fresh and reduced catalysts

Table S4 BET surface areas, pore volumes and pore sizes of catalysts

| Samples    | BET surface areas<br>(m <sup>2</sup> /g) | Pore volumes<br>(cm <sup>3</sup> /g) | Pore sizes<br>(nm) |
|------------|------------------------------------------|--------------------------------------|--------------------|
| SAPO       | 439.2                                    | 0.00599                              | 14.9               |
| FCK        | 38.36                                    | 0.0321                               | 29.8               |
| FCK/SAPO   | 137.64                                   | 0.0272                               | 10.9               |
| R-FCK      | 29.33                                    | 0.0296                               | 38.1               |
| R-FCK/SAPO | 117.0                                    | 0.0203                               | 14.5               |

### S19. Detailed description of CO<sub>2</sub>-TPD profiles

The CO<sub>2</sub>-TPD profiles of R-FCK, R-FCK/SAPO, and SAPO are shown in Fig. 3j. Both R-FCK-SAPO and R-FCK have three peaks at 101-128 °C, 251-272 °C and 697-768 °C, while SAPO exhibits only one peak at 167 °C. The peaks at the low temperature (101-167 °C) are attributed to physical adsorption of CO<sub>2</sub>. The peaks at medium temperature (251-272 °C) are attributed to chemical adsorption of CO<sub>2</sub>, which results from the adsorption of CO<sub>2</sub> on surface -OH and surface defects. The peaks at high temperature (697-768 °C) result from the loss of lattice oxygen.

## S20. H<sub>2</sub> adsorption capacity v.s. reaction temperature and H<sub>2</sub> adsorption rates

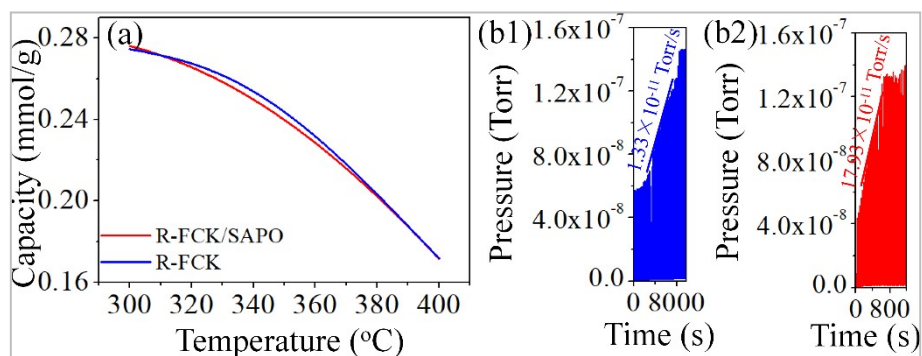

Fig. S11. (a) H<sub>2</sub> adsorption capacity v.s. reaction temperature; H<sub>2</sub> adsorption rates of (b1) R-FCK and (b2) R-FCK/SAPO.

## S21. Carbon number distributions at optimal reaction temperature

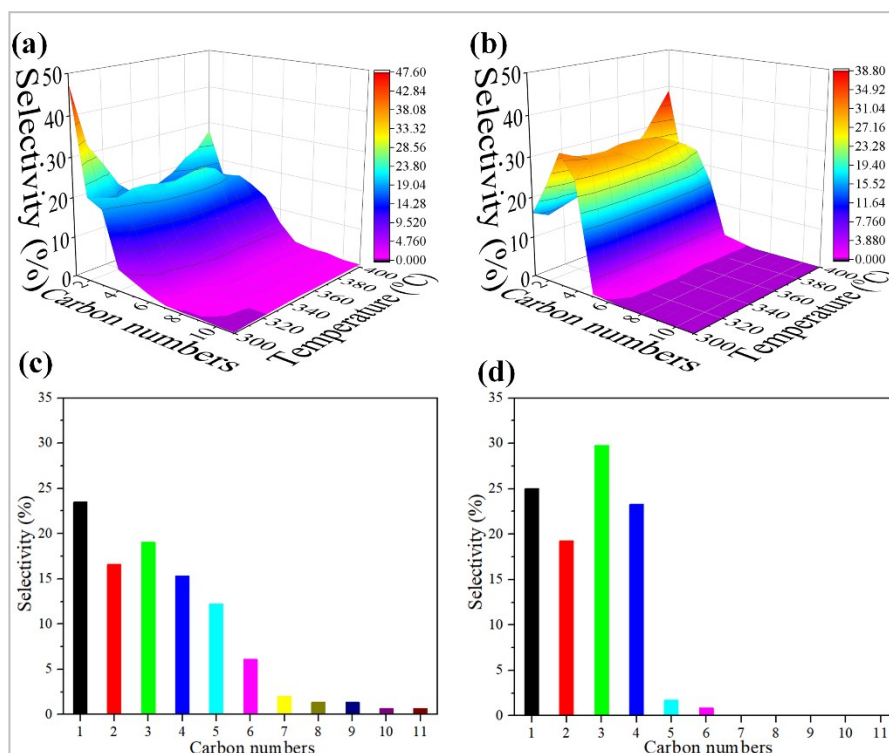

Fig. S12. Carbon number distributions at optimal reaction temperature [(a) R-FCK at 370 °C; (b) R-FCK/SAPO at 340 °C]

## S22. Catalytic dehydration of methanol over SAPO

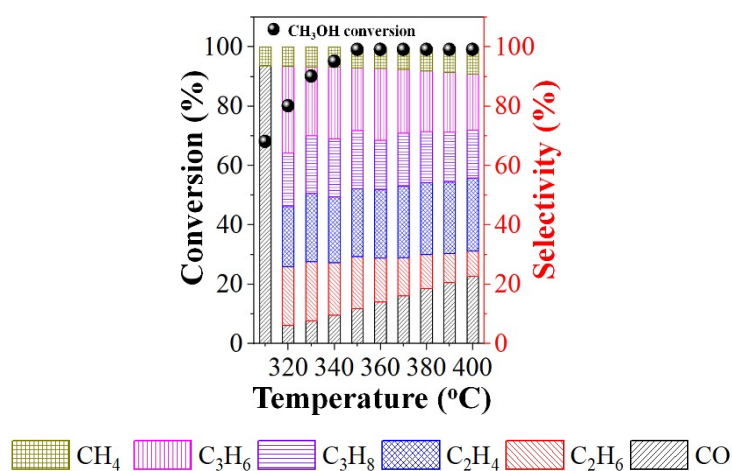

Fig. S13 Catalytic dehydration of methanol over SAPO

## References

1. Nie, X.; Wang, H.; Janik, M. J.; Chen, Y.; Guo, X.; Song, C. Mechanistic insight into C-C coupling over Fe-Cu bimetallic catalysts in CO<sub>2</sub> hydrogenation. *Journal of Physical Chemistry C* **2017**, *121*, 13164-13174.
2. Nie, X.; Wang, H.; Janik, M. J.; Guo, X.; Song, C. Computational investigation of Fe-Cu bimetallic catalysts for CO<sub>2</sub> hydrogenation. *Journal of Physical Chemistry C* **2016**, *120*, 9364-9373.
3. Hwang, S. -M.; Han, S. J.; Min, J. E.; Park, H. G.; Jun, K. -W.; Kim, S. K. Mechanistic insights into Cu and K promoted Fe-catalyzed production of liquid hydrocarbons via CO<sub>2</sub> hydrogenation. *Journal of CO<sub>2</sub> Utilization* **2019**, *34*, 522-532.
4. K. Ray, G. Deo, A potential descriptor for the CO<sub>2</sub> hydrogenation to CH<sub>4</sub> over Al<sub>2</sub>O<sub>3</sub> supported Ni and Ni-based alloy catalysts. *Applied Catalysis B: Environmental*, 2017, *218*, 525-537.
5. Y. Wang, H. Gao, J. Wang, Y. Han, Y. Dai, B. Sun, First-principles calculations of Ag addition on the diffusion mechanisms of Cu-Fe alloys. *Solid State Communications*, 2014, *183*, 60-63.
6. M. Elahifard, A. Fazeli, A. Joshani, M. Gholami, Ab-Initio calculations of the CO adsorption and dissociation on substitutional Fe-Cu surface alloys relevant to Fischer-Tropsch Synthesis: bcc-(Cu)Fe(100) and fcc-(Fe)Cu(100). *Surface and Interface Analysis*, 2013, *45*, 1081-1087.

7. Ding, J.; Huang, L.; Gong, W.; Fan, M.; Zhong, Q.; Russell, A. G.; Gu, H.; Zhang, H.; Zhang, Y.; Ye, R.-p., CO<sub>2</sub> hydrogenation to light olefins with high-performance Fe<sub>0.30</sub>Co<sub>0.15</sub>Zr<sub>0.45</sub>K<sub>0.10</sub>O<sub>1.63</sub>. *Journal of Catalysis* **2019**, *377*, 224-232.
8. Li, Z.; Wang, J.; Qu, Y.; Liu, H.; Tang, C.; Miao, S.; Feng, Z.; An, H.; Li, C., Highly Selective conversion of carbon dioxide to lower olefins. *ACS Catalysis* **2017**, *7* (12), 8544-8548.
9. Gao, P.; Dang, S.; Li, S.; Bu, X.; Liu, Z.; Qiu, M.; Yang, C.; Wang, H.; Zhong, L.; Han, Y.; Liu, Q.; Wei, W.; Sun, Y., Direct production of lower olefins from CO<sub>2</sub> conversion via bifunctional catalysis. *ACS Catalysis* **2018**, *8* (1), 571-578.
10. Liu, X.; Wang, M.; Zhou, C.; Zhou, W.; Cheng, K.; Kang, J.; Zhang, Q.; Deng, W.; Wang, Y., Selective transformation of carbon dioxide into lower olefins with a bifunctional catalyst composed of ZnGa<sub>2</sub>O<sub>4</sub> and SAPO-34. *Chemical Communications* **2018**, *54* (2), 140-143.
11. Xie, C.; Chen, C.; Yu, Y.; Su, J.; Li, Y.; Somorjai, G. A.; Yang, P., Tandem Catalysis for CO<sub>2</sub> Hydrogenation to C<sub>2</sub>-C<sub>4</sub> Hydrocarbons. *Nano Letters* **2017**, *17* (6), 3798-3802.
12. Choi, Y. H.; Jang, Y. J.; Park, H.; Kim, W. Y.; Lee, Y. H.; Choi, S. H.; Lee, J. S., Carbon dioxide Fischer-Tropsch synthesis: A new path to carbon-neutral fuels. *Applied Catalysis B: Environmental* **2017**, *202*, 605-610.
13. Gnanamani, M. K.; Jacobs, G.; Hamdeh, H. H.; Shafer, W. D.; Liu, F.; Hopps, S. D.; Thomas, G. A.; Davis, B. H., Hydrogenation of carbon dioxide over Co-Fe bimetallic catalysts. *ACS Catalysis* **2016**, *6* (2), 913-927.
14. Shafer, W. D.; Jacobs, G.; Graham, U. M.; Hamdeh, H. H.; Davis, B. H., Increased CO<sub>2</sub> hydrogenation to liquid products using promoted iron catalysts. *Journal of Catalysis* **2019**, *369*, 239-248.
15. Fujiwara, M.; Satake, T.; Shiokawa, K.; Sakurai, H., CO<sub>2</sub> hydrogenation for C<sub>2</sub><sup>+</sup> hydrocarbon synthesis over composite catalyst using surface modified HB zeolite. *Applied Catalysis B: Environmental* **2015**, *179*, 37-43.
16. Visconti, C. G.; Martinelli, M.; Falbo, L.; Infantes-Molina, A.; Lietti, L.; Forzatti, P.; Iaquaniello, G.; Palo, E.; Picutti, B.; Brignoli, F., CO<sub>2</sub> hydrogenation to lower

olefins on a high surface area K-promoted bulk Fe-catalyst. *Applied Catalysis B: Environmental* **2017**, *200*, 530-542.

17. Zhang, J.; Lu, S.; Su, X.; Fan, S.; Ma, Q.; Zhao, T., Selective formation of light olefins from CO<sub>2</sub> hydrogenation over Fe-Zn-K catalysts. *Journal of CO<sub>2</sub> Utilization* **2015**, *12*, 95-100.

18. Hu, S.; Liu, M.; Ding, F.; Song, C.; Zhang, G.; Guo, X., Hydrothermally stable MOFs for CO<sub>2</sub> hydrogenation over iron-based catalyst to light olefins. *Journal of CO<sub>2</sub> Utilization* **2016**, *15*, 89-95.

19. Sathawong, R.; Koizumi, N.; Song, C.; Prasassarakich, P., Light olefin synthesis from CO<sub>2</sub> hydrogenation over K-promoted Fe-Co bimetallic catalysts. *Catalysis Today* **2015**, *251*, 34-40.

20. Kim, J.-S.; Lee, S.; Lee, S.-B.; Choi, M.-J.; Lee, K.-W., Performance of catalytic reactors for the hydrogenation of CO<sub>2</sub> to hydrocarbons. *Catalysis Today* **2006**, *115* (1), 228-234.
