# Supplementary material for: Metal–support interactions in Fe–Cu–K admixed with SAPO-34 catalysts for highly selective transformation of CO2 and H2 into lower olefins
Source: Royal Society of Chemistry journal article supplement (doi:10.1039/d1ta03327a), 2021-01-01
Supplement: d1ta03327a2.pdf [file d1ta03327a2.pdf]

R1 In-situ XRD pattern of R-FCK/SAPO in reaction atmosphere

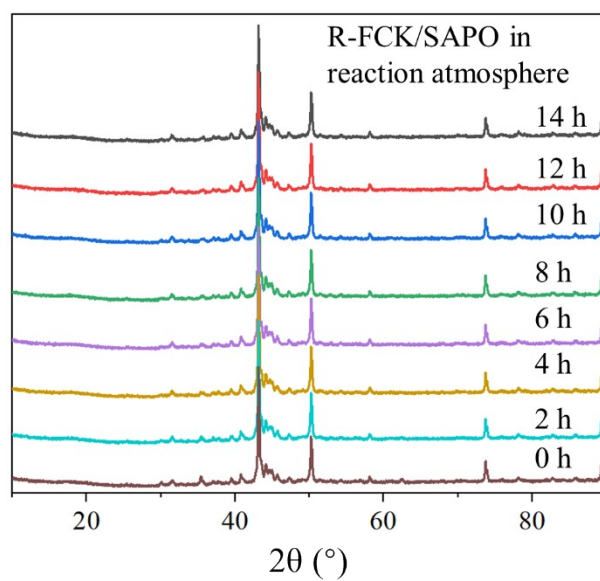

Fig. R1 In-situ XRD pattern of R-FCK/SAPO in reaction atmosphere
